# Supplementary material
Source: PubMed Central journal article supplement (PMC2442552)
Supplement: pp.108.117564_1.pdf [file pp.108.117564_1.pdf]

# Supplemental Fig. S1

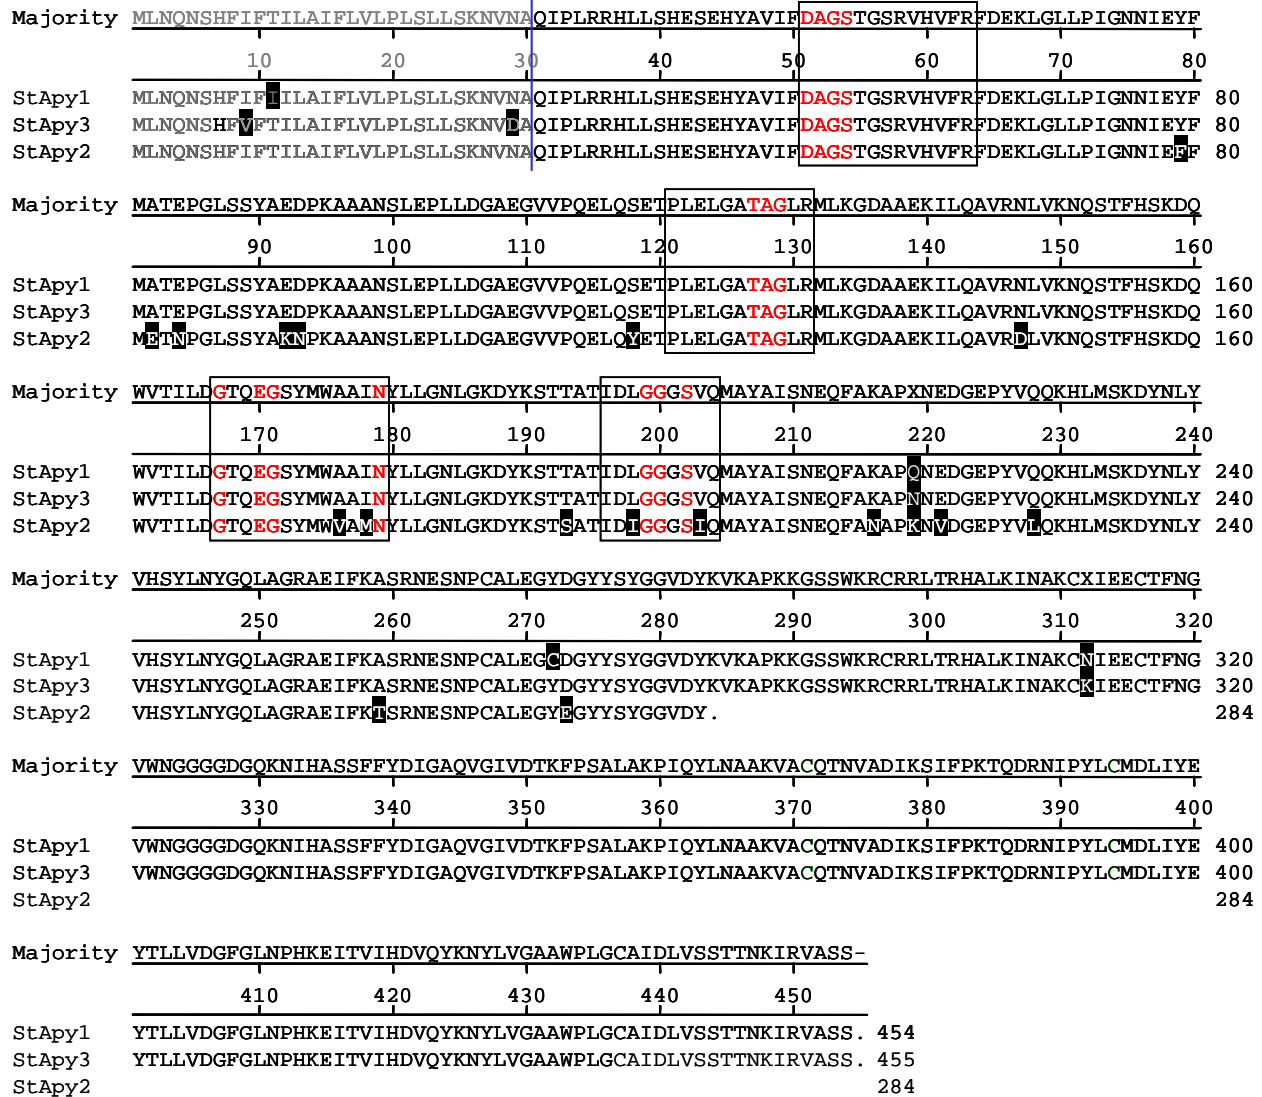

**Supplemental Fig. S1. Alignment of potato specific apyrases cloned to date.** Residues not matching the consensus sequence are shaded black, the apyrase conserved regions (ACRs) are enclosed by a black frame and highly conserved amino acids within the ACRs are highlighted in red. The amino acids of the putative secretory signal peptide from residue 1 to 30 are highlighted in grey and the putative processing site between amino acid 30 and 31 is marked with a blue line.
