# Supplementary material
Source: PubMed Central journal article supplement (PMC2442552)
Supplement: pp.108.117564_2.pdf [file pp.108.117564_2.pdf]

# Supplemental Fig. S2

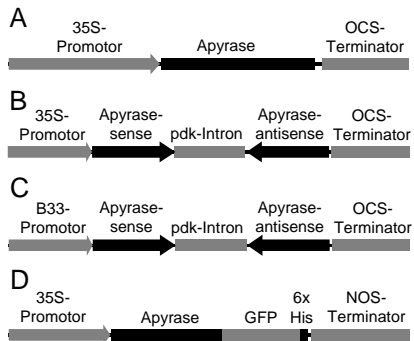

**Supplemental Fig. S2. Plasmids used for manipulation and localization of apyrase. (A) 35S-overexpressor, (B) 35S-RNAi, (C) B33-RNAi and (D) 35S-apyrase-GFP.**
