# Supplementary material
Source: PubMed Central journal article supplement (PMC2442552)
Supplement: pp.108.117564_3.pdf [file pp.108.117564_3.pdf]

## Supplemental Fig. S3

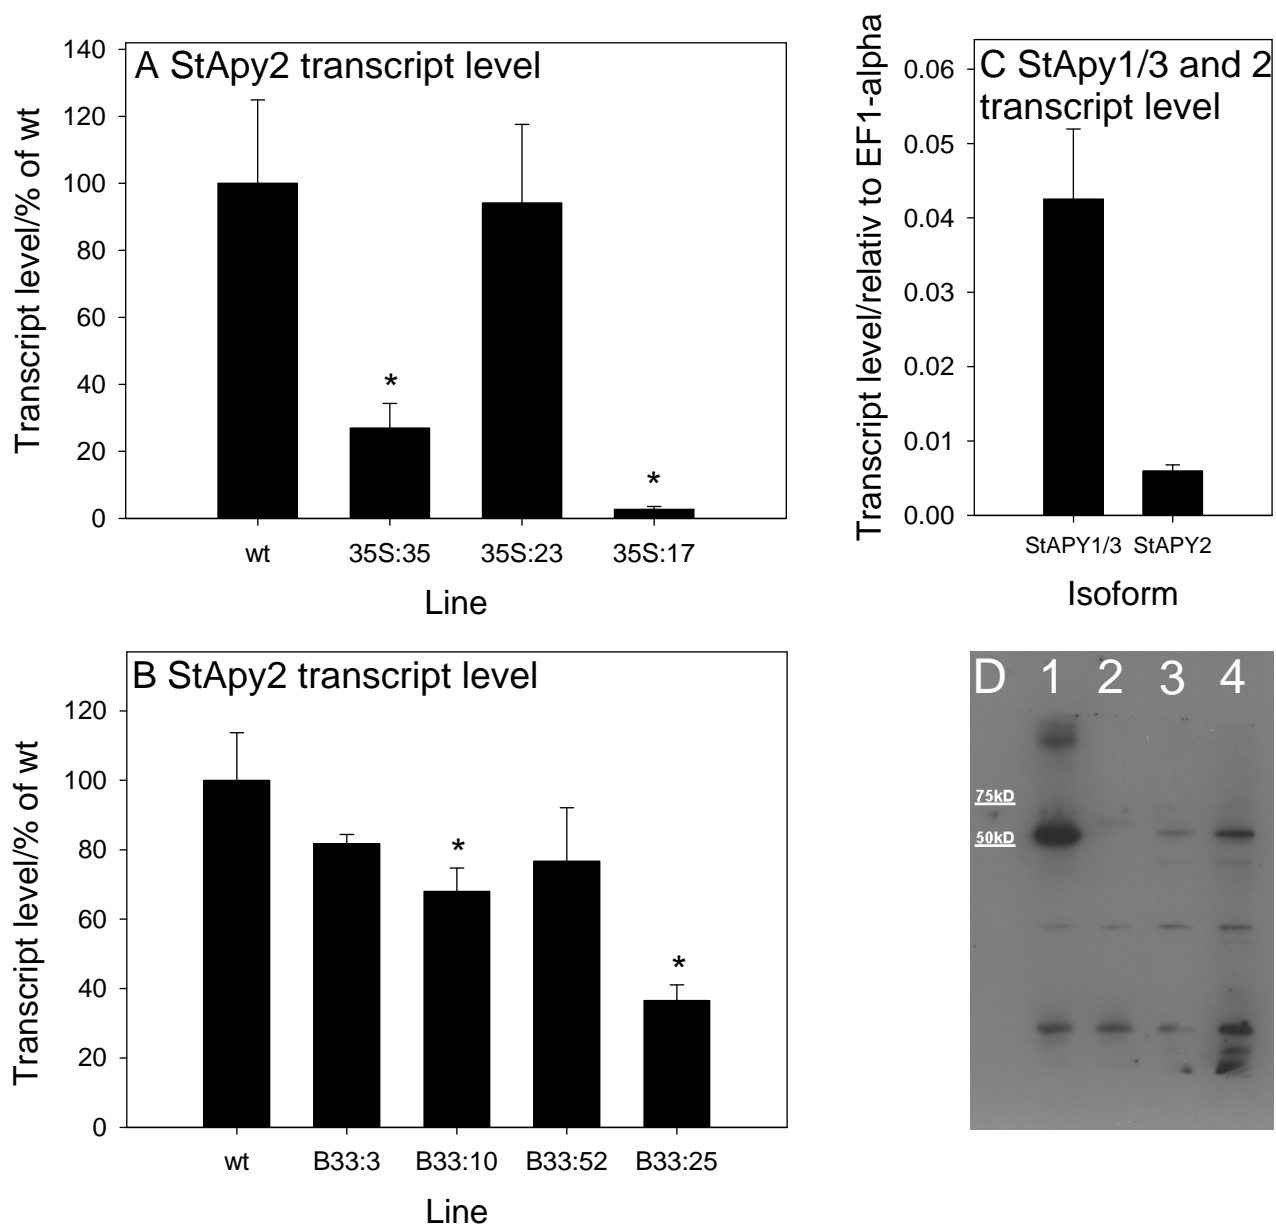

**Supplemental Fig. S3. Potato apyrase transcript and protein abundance.** StAPY2 transcript levels in tubers from the **(A)** 35S-RNAi lines and **(B)** B33-RNAi lines. **(C)** Comparison of the relative transcript abundance of StAPY1/3 and StAPY2 in wild type tubers. **(D)** Five  $\mu$ g protein was analyzed using a serum raised against apyrase. (1) 35S:17 + 50 mU commercially available apyrase (SIGMA), (2) 35S:17 without additional apyrase, (3) wt, (4) 35S:113. The band appearing at appr. 52kD corresponds to potato apyrase.
