# Supplementary material
Source: PubMed Central journal article supplement (PMC2442552)
Supplement: pp.108.117564_4.pdf [file pp.108.117564_4.pdf]

# Supplemental Fig. S4

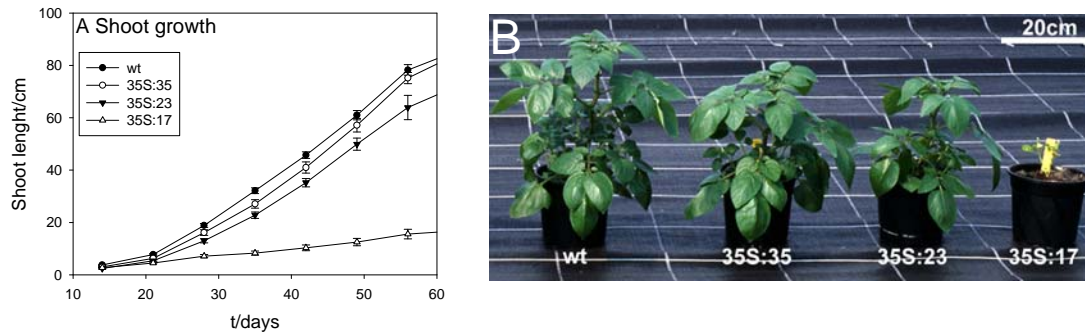

**Supplement Fig. S4: Effect of a decrease in apyrase activity under control of the 35S promoter on overall shoot growth. (A)** Shoot growth of plants grown in an unconditioned greenhouse was weekly monitored for 70 days and **(B)** pictures of representative plants were taken from seven week old plants. Results are means  $\pm$ SE ( $n = 10-13$ ).
