# Supplementary material
Source: PubMed Central journal article supplement (PMC2442552)
Supplement: pp.108.117564_5.pdf [file pp.108.117564_5.pdf]

# Supplemental Fig. S5

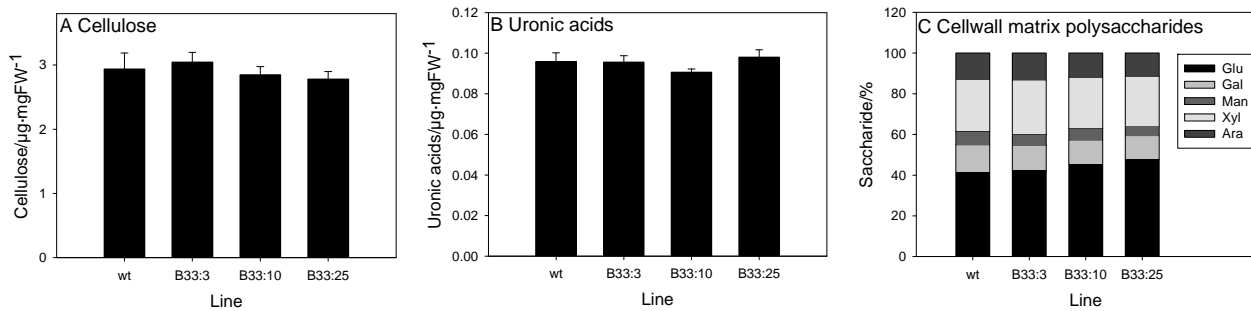

**Supplemental Fig. S5 Cell wall composition of tubers from the B33-RNAi lines.** (A) Cellulose, (B) uronic acids and (C) matrix polysaccharides (Glu = glucose, Gal = galactose, Man = mannose, Xyl = xylose, Ara = arabinose). Results are means  $\pm$ SE ( $n = 8$ ).
