# Supplementary material
Source: PubMed Central journal article supplement (PMC2442552)
Supplement: pp.108.117564_6.pdf [file pp.108.117564_6.pdf]

# Supplemental Fig. S6

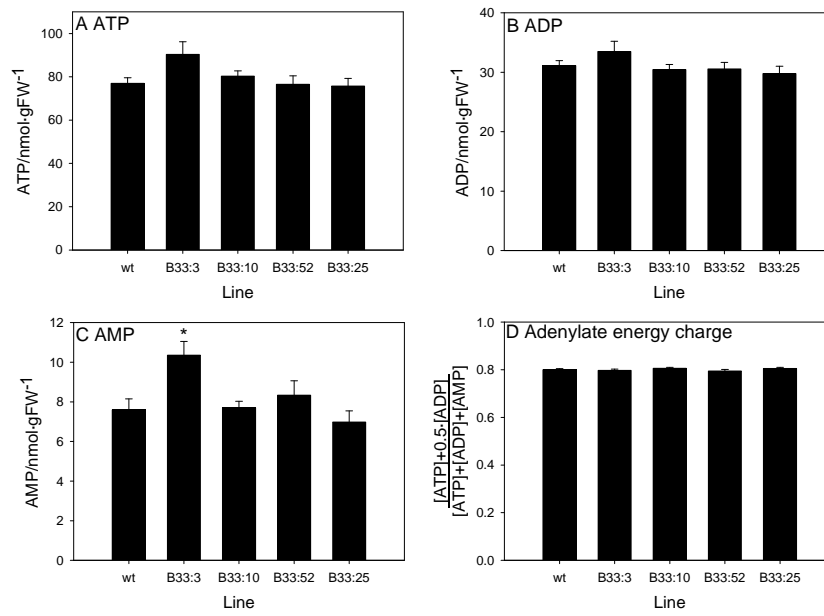

**Supplemental Fig. S6. Overall adenylate levels in tubers with decreased apyrase under the control of the tuber-specific B33-promoter.** Growing tubers from 8 week-old plants were harvested and material immediately shock-frozen in liquid nitrogen before extraction for the determination of overall adenine nucleotides: **(A)** ATP, **(B)** ADP, **(C)** AMP, and **(D)** adenylate energy charge calculated using the data from (A-C). Results are means  $\pm$  SE ( $n = 7-8$ ). Significant differences to the wild-type according to the student's t-test are indicated with asterisks ( $p < 0.05$ ).
